# Supplementary material
Source: publisher figshare collection journal article supplement (https://diabetesjournals.figshare.com/ndownloader/files/26231492)
Supplement: Supplementary file 1 [file 26231492]

## Sheet: Sheet1
Table S1 primers used in PCRs
RT-PCR primers
genes	forward	reverse
Ins1	AACTAAGGCCCACCTCGAC	TCAGTGGCATTTACACGGTT
Ins2	AGCCCTAAGTGATCCGCTAC	GGCCATGTTGAAACAATAACCT
Gcg	CATTCACCAGCGACTACAGC	CCAGCCAAGCAATGAATTCCT
Pp	CCCCTGGAGCCAATGTACC	GAGCAGGGAATCAAGCCAAC
Sst	TGCCACCGGGAAACAGGAAC	TTCTTGCAGCCAGCTTTGCG
Nkx6.1	CCATCTTCTGGCCCGGAGT	CTCCAGGGCGAAGATTTGCT
Pdx1	CTCCCTTTCCCGTGGATGAA	GGTCCCGCTACTACGTTTCT
Pax6	GGGACCACTTCAACAGGACT	GGCTCCAGTTCAGGACAGTT
Mafa	GCCACCACGTGCGCTTG	CCGCTTCTGTTTCAGTCGGAT
Mafb	AATCCCCACCTGAATTTGCT	CGATGCAGGACGAATATCCAC
Rbp4	CGACAAGGCTCGTTTCTCTG	GAAAGTGCCCACCATGTCTG
Hhex	GTGAGGTTCTCCAACGACCA	TGTCCAAACTGTCCAACGCA
Actb	AGCAGTTGGTTGGAGCAAACATCC	ACAGAAGCAATGCTGTCACCTTCC
ChIP-PCR primers
targets	forward	reverse
Hhex-intron	TCACTAATGCTAAAAGCCACCT	TTTCCTGCGTTAATGAGATAAACA
Hhex-18kb-d	AAAAGGAGCAAAATGTGGACTT	GTGAGCACACAGCACTTAGC
Amy1-pro	CCTGCATCCTATCTGACAACCA	TCAAGTGTGCTCTTAAGTTGCT
